# Supplementary material for: Genomic Characterization and Therapeutic Targeting of HPV Undetected Cervical Carcinomas
Source: MDPI journal article supplement (doi:10.3390/cancers13184551), 2021-09-10
Supplement: s1 [file s1]

**Table S1: Clinical characteristics of patient cohorts**

|                                      | TCGA Cohort ( <i>n</i> = 300) |                   |                                  | NOR Cohort ( <i>n</i> =79) |                   |                                  | WUSM Cohort ( <i>n</i> = 86) |                   |                              |
|--------------------------------------|-------------------------------|-------------------|----------------------------------|----------------------------|-------------------|----------------------------------|------------------------------|-------------------|------------------------------|
|                                      | HPV<br>Positive               | HPV<br>Undetected | <i>p</i> -<br>value <sup>a</sup> | HPV<br>Positive            | HPV<br>Undetected | <i>p</i> -<br>value <sup>a</sup> | HPV<br>Positive              | HPV<br>Undetected | <i>p</i> -value <sup>a</sup> |
| <b>Age at diagnosis</b>              | <i>p</i> =0.008               |                   |                                  | <i>p</i> =0.05             |                   |                                  | <i>p</i> =0.02               |                   |                              |
| <50                                  | 179<br>(62%)                  | 6 (32%)           |                                  | 58 (78%)                   | 2 (40%)           |                                  | 30 (40%)                     | 0 (0%)            |                              |
| ≥50                                  | 108<br>(38%)                  | 13 (68%)          |                                  | 16 (22%)                   | 3 (60%)           |                                  | 45 (60%)                     | 11 (100%)         |                              |
| <b>Histological type</b>             | <i>p</i> =0.001               |                   |                                  | <i>p</i> =0.67             |                   |                                  | <i>p</i> =8.5e-6             |                   |                              |
| Squamous cell carcinoma              | 239<br>(85%)                  | 10 (53%)          |                                  | 46 (62%)                   | 2 (40%)           |                                  | 68 (91%)                     | 4 (36%)           |                              |
| Adenocarcinoma                       | 39 (14%)                      | 8 (42%)           |                                  | 20 (27%)                   | 2 (40%)           |                                  | 4 (5%)                       | 5 (45%)           |                              |
| Adenosquamous carcinoma              | 3 (1%)                        | 1 (5%)            |                                  | 6 (8%)                     | 1 (20%)           |                                  | 2 (3%)                       | 0 (0%)            |                              |
| Neuroendocrine carcinoma             | NA                            | NA                |                                  | 2 (3%)                     | 0 (0%)            |                                  | NA                           | NA                |                              |
| Small cell                           | NA                            | NA                |                                  | NA                         | NA                |                                  | 1 (1%)                       | 2 (18%)           |                              |
| <b>FIGO stage</b>                    | <i>p</i> =0.28                |                   |                                  | <i>p</i> =0.27             |                   |                                  | <i>p</i> =0.14               |                   |                              |
| I                                    | 151<br>(55%)                  | 10 (53%)          |                                  | 63 (85%)                   | 3 (60%)           |                                  | 23 (31%)                     | 0 (0%)            |                              |
| II                                   | 62 (23%)                      | 5 (26%)           |                                  | 10 (14%)                   | 2 (40%)           |                                  | 26 (35%)                     | 4 (36%)           |                              |
| III                                  | 44 (16%)                      | 1 (5%)            |                                  | 1 (1%)                     | 0 (0%)            |                                  | 23 (31%)                     | 6 (55%)           |                              |
| IV                                   | 17 (6%)                       | 3 (16%)           |                                  | 0 (0%)                     | 0 (0%)            |                                  | 3 (4%)                       | 1 (9%)            |                              |
| <b>Primary Treatment<sup>b</sup></b> | NA                            |                   |                                  | <i>p</i> =0.61             |                   |                                  | <i>p</i> = 0.52              |                   |                              |
| Radiation +/- chemo                  | NA                            | NA                |                                  | 7 (10%)                    | 1 (25%)           |                                  | 74 (99%)                     | 11 (100%)         |                              |
| Meigs +/- BSO                        | NA                            | NA                |                                  | 64 (89%)                   | 3 (75%)           |                                  | NA                           | NA                |                              |
| Hysterectomy + BSO                   | NA                            | NA                |                                  | 1 (1%)                     | 0 (0%)            |                                  | NA                           | NA                |                              |

<sup>a</sup>Pearsons Chi Square test (2-sided)

<sup>b</sup>Missing data for three patients

|          |                 |           |              |          |         |
|----------|-----------------|-----------|--------------|----------|---------|
| AARD     | CREBBP          | FLT4      | KMT2C        | NFE2L3   | SMAD4   |
| ACVR1B   | CTCF            | FMNL2     | KMT2D        | NOTCH1   | SMARCA2 |
| ACVR2A   | CTNNB1          | FOXA2     | KPTN         | NRG2     | SMC1A   |
| ADARB1   | CXADR           | FOXP2     | KRAS         | NSD1     | SOX1    |
| ADRB1    | DCAF8L2         | GABBR2    | KRT10        | OLIG1    | SOX17   |
| AJUBA    | DIAPH1          | GATA3     | KRT78        | OPLAH    | SOX8    |
| APC      | DNMT3A          | GNAS      | LIFR         | ORAOV1   | SOX9    |
| AR       | DOCK6           | H3F3B     | LINC00087    | PAXIP1   | SPAG1   |
| ARHGAP35 | EGFR            | HGF       | LINC00623    | PBRM1    | SPOP    |
| ARID1A   | EGR3            | HIST1H1C  | LINC00662    | PCBP1    | SRRM4   |
| ARID5B   | EHMT2           | HIST1H2BC | LOC101930221 | PDGFRA   | STAG2   |
| ASXL1    | ELF3            | HIST1H2BD | LRRK2        | PIK3CA   | STK11   |
| ATM      | ENSG00000200418 | HIST1H2BF | MALAT1       | PIK3CG   | TAF1    |
| ATR      | ENSG00000223804 | HIST1H2BL | MAP2K4       | PIK3R1   | TAF1L   |
| ATRX     | ENSG00000233221 | HIST1H2BN | MAP3K1       | PLEC     | TAOK2   |
| ATXN1    | ENSG00000253125 | HIST1H4D  | MAP7         | PLEKHG4B | TBP     |
| AXIN2    | ENSG00000255498 | HIST1H4F  | MAPK1        | PODNL1   | TERF1   |
| B4GALT3  | ENSG00000257913 | HIST1H4K  | MECOM        | POLQ     | TET2    |
| BAGE2    | ENSG00000258430 | HIST4H4   | MED1         | PPAP2B   | TGFBR2  |
| BRAF     | ENSG00000261405 | HLA-A     | MED15        | PPP2R1A  | TLR4    |
| BRCA1    | ENSG00000267934 | HLA-B     | MICA         | PRX      | TNRC18  |
| BRCA2    | ENSG00000269941 | HLA-C     | MICALCL      | PTEN     | TNRC6A  |
| BTN2A2   | ENSG00000272057 | HLA-DRB1  | MIR142       | PTENP1   | TOP1MT  |
| C11orf80 | ENSG00000273000 | HLA-E     | MIR3648      | PTPN11   | TP53    |
| C9orf91  | EP300           | HLA-F     | MLLT3        | RAD21    | TPTE    |
| CAPN15   | EPHA3           | HLA-G     | MN1          | RB1      | TSHZ2   |
| CASP8    | EPHB6           | HLA-J     | MRGPRE       | RNA28S5  | TSHZ3   |
| CBFB     | EPPK1           | HLA-L     | MT-ND6       | RPL5     | U2AF1   |
| CBX7     | ERBB2           | HNRNPUL2  | MT-RNR1      | RUNX1    | USP9X   |
| CCDC97   | ERBB3           | HOXA9     | MTOR         | RYR1     | VEZF1   |
| CCND1    | ERCC2           | HRC       | MUC2         | SETD2    | WT1     |
| CD247    | ESPNP           | HTT       | MUC4         | SEZ6L2   | ZFHX3   |
| CDH1     | EZH2            | IDH1      | MUC5AC       | SF3B1    |         |
| CDK12    | FAM157C         | IDH2      | MYO15A       | SHARPIN  |         |
| CDKN1A   | FAM194A         | IRF2BPL   | NANOS1       | SHOC2    |         |
| CDKN1C   | FBXW7           | KCNMA1    | NAV3         | SIGIRR   |         |
| CDKN2A   | FGFR2           | KCNN3     | NCOR1        | SIN3A    |         |
| CEBPA    | FGFR3           | KCTD1     | NCOR1P1      | SIX5     |         |
| CHEK2P2  | FKBP9L          | KDM5C     | NDUFB2       | SLC24A1  |         |
| CHGA     | FLNA            | KDM6A     | NF1          | SLC2A8   |         |
| COL17A1  | FLT3            | KMT2B     | NFE2L2       | SMAD2    |         |

**Table S2: Targeted Gene Panel for WUSM Cohort Sequencing**

Genes included in the WUSM targeted gene panel for next-generation sequencing of patient tumor samples.

Significantly mutated genes (SMGs) in HPV<sup>U</sup> tumors identified by MutSig2CV analysis

| Gene          | Patients | Relative frequency | Unique sites | Non-silent mutations | Missense mutations | Silent mutations | "LOF" mutations | FDR      |
|---------------|----------|--------------------|--------------|----------------------|--------------------|------------------|-----------------|----------|
| <i>TP53</i>   | 12       | 50%                | 13           | 13                   | 8                  | 1                | 5               | 9.03E-06 |
| <i>PTEN</i>   | 7        | 29%                | 9            | 11                   | 6                  | 0                | 5               | 5.27E-04 |
| <i>KRAS</i>   | 5        | 21%                | 3            | 5                    | 5                  | 0                | 0               | 1.28E-03 |
| <i>ARID1A</i> | 8        | 33%                | 12           | 12                   | 3                  | 0                | 9               | 1.74E-02 |

Co-occurrence of SMGs in HPV<sup>U</sup> tumors

|             | ZNF331 WT | ZNF331 Mutant | <i>p</i> -value |
|-------------|-----------|---------------|-----------------|
| CTCF WT     | 19        | 1             | 7.623E-03       |
| CTCF Mutant | 1         | 3             |                 |

|               | ZNF331 WT | ZNF331 Mutant | <i>p</i> -value |
|---------------|-----------|---------------|-----------------|
| ARID1A WT     | 16        | 0             | 6.59E-03        |
| ARID1A Mutant | 4         | 4             |                 |

|             | KIAA1012 WT | KIAA1012 Mutant | <i>p</i> -value |
|-------------|-------------|-----------------|-----------------|
| MC5R WT     | 20          | 1               | 1.98E-04        |
| MC5R Mutant | 0           | 3               |                 |

Mutual exclusivity of SMGs in HPV<sup>U</sup> tumors

|               | TP53 WT | TP53 Mutant | <i>p</i> -value |
|---------------|---------|-------------|-----------------|
| ARID1A WT     | 5       | 11          | 2.7E-02         |
| ARID1A Mutant | 7       | 1           |                 |

|               | TP53 WT | TP53 Mutant | <i>p</i> -value       |
|---------------|---------|-------------|-----------------------|
| ZNF331 WT     | 8       | 12          | 4.66E-02 <sup>1</sup> |
| ZNF331 Mutant | 4       | 0           |                       |

|               | TP53 WT | TP53 Mutant | <i>p</i> -value       |
|---------------|---------|-------------|-----------------------|
| NCAPH2 WT     | 8       | 12          | 4.66E-02 <sup>1</sup> |
| NCAPH2 Mutant | 4       | 0           |                       |

**Table S3: MutSig2CV SMG list and co-occurrence/mutual exclusivity of SMGs in HPV<sup>U</sup> tumors**

"LOF" depicts nonsense, frameshift or splice-site mutations (which are often regarded as "loss of function" mutations); FDR depicts false discovery rate (Benjamini-Hochberg procedure, <sup>1</sup>one-tailed test).

| Tissue type | Cell Line    | HPV status | RB1         | TP53                    |
|-------------|--------------|------------|-------------|-------------------------|
| CESC        | C33A         | -          | c.1961-1G>A | p.R273C                 |
|             | HT3          | -          | p. Q444R    | p.G152V/p.G245V/p.E285K |
|             | CaSki        | HPV 16     | WT          | WT                      |
|             | SiHa         | HPV 16     | WT          | WT                      |
| HNSCC       | Fadu         | -          | WT          | p.R248L                 |
|             | UM-SCC-47    | HPV 16     | WT          | WT                      |
|             | UPC1-SCC-154 | HPV 16     | WT          | WT                      |

**Table S4: HPV status, RB and TP53 mutational profile across cell lines**

COSMIC cell lines database used to identify RB1 and TP53 genetic alterations.

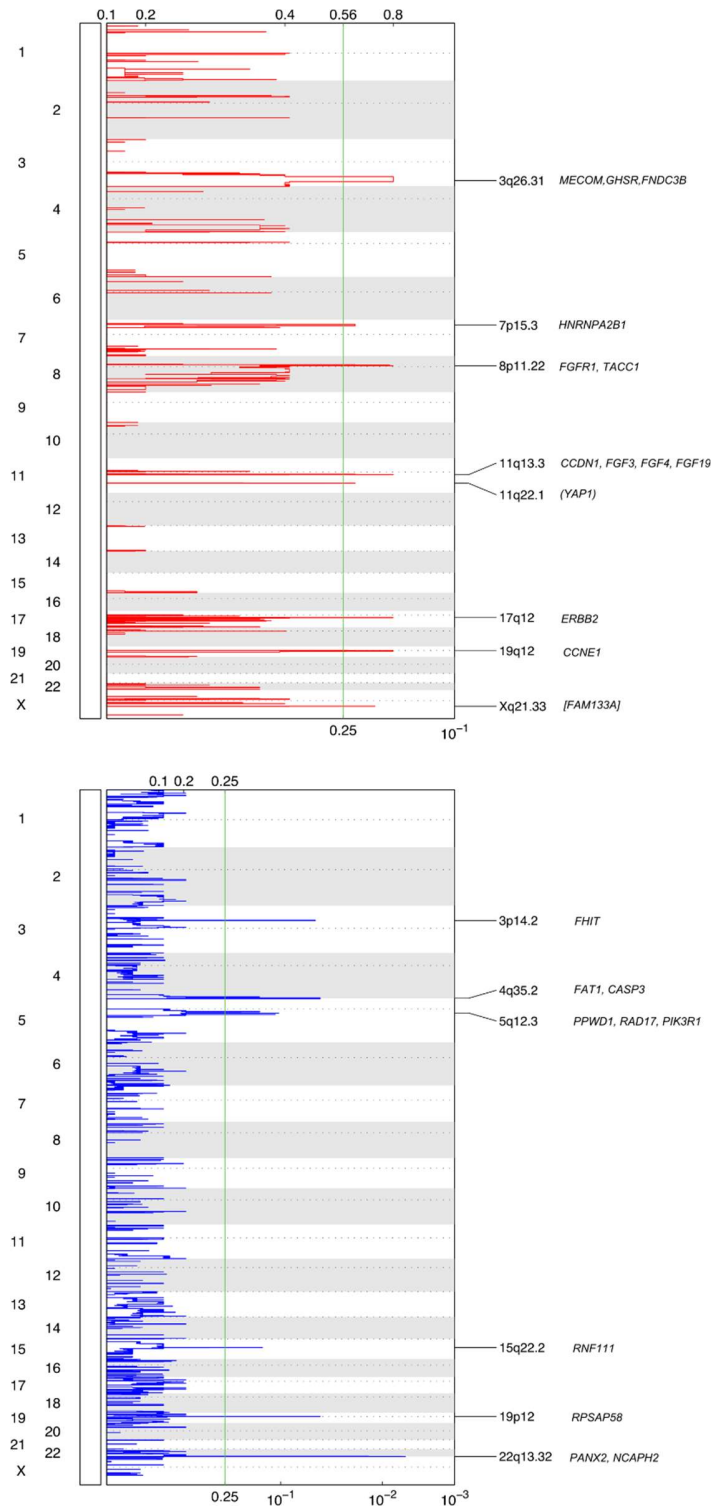

**Figure S1: Somatic copy number alterations (SCNAs) in HPV<sup>U</sup> tumors**  
 GISTIC2.0 analysis of A) amplifications and B) deletions in 24 HPV<sup>U</sup> tumors (threshold of  $q < 0.25$ ).

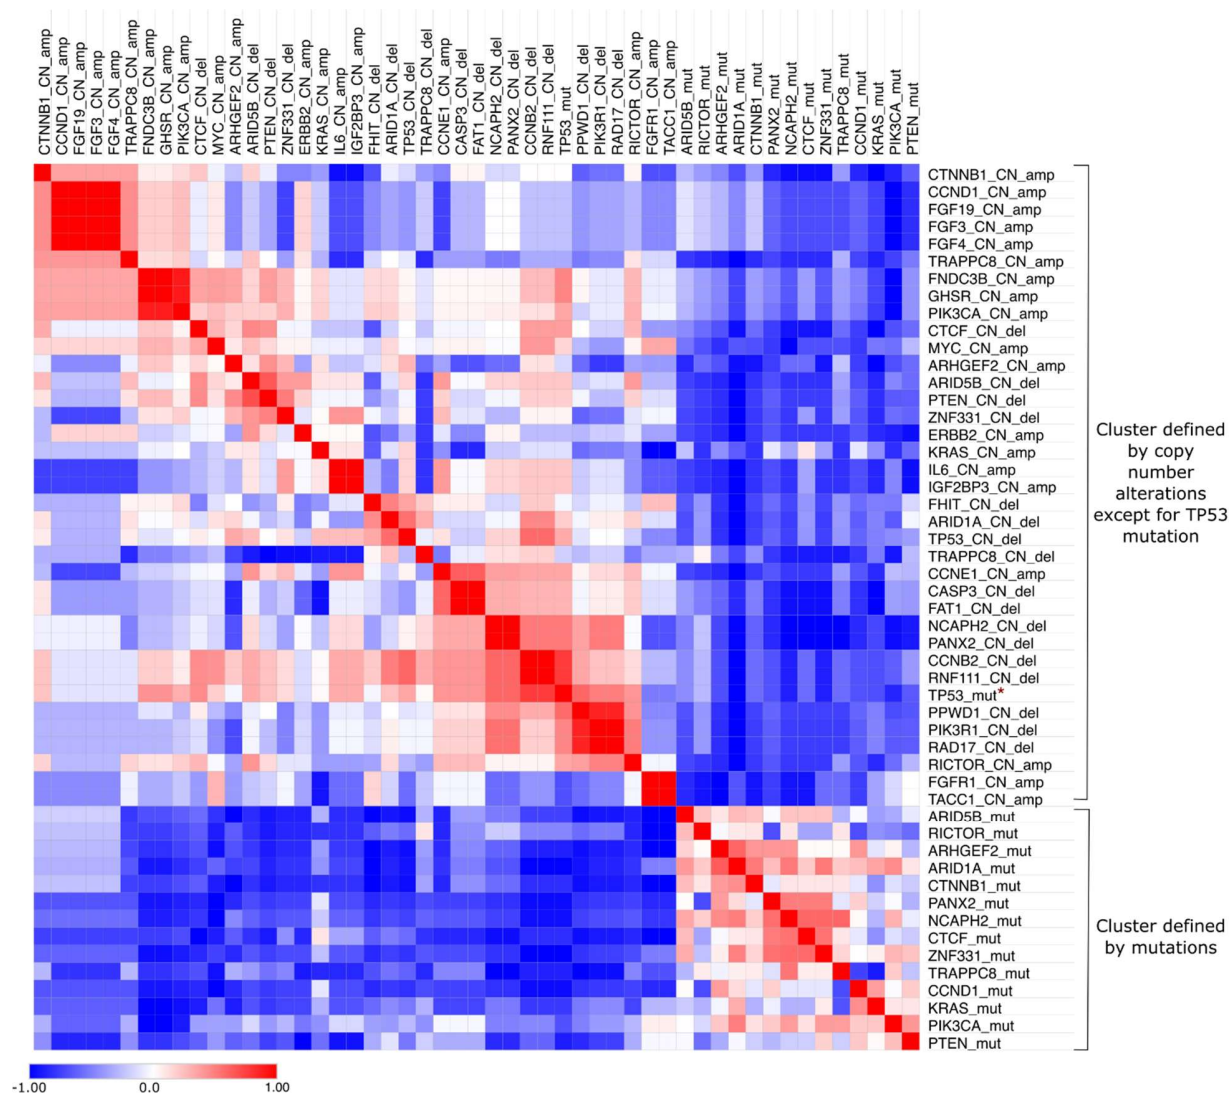

**Figure S2: Similarity matrix for presence/absence of mutations and SCNAs in HPV<sup>U</sup> tumors**

A complementary depiction of data presented in Main Figure 2. Pearson correlation-based similarity heatmap was generated on data for presence or absence of mutations and SCNAs using the Broad Morpheus suite of tools.

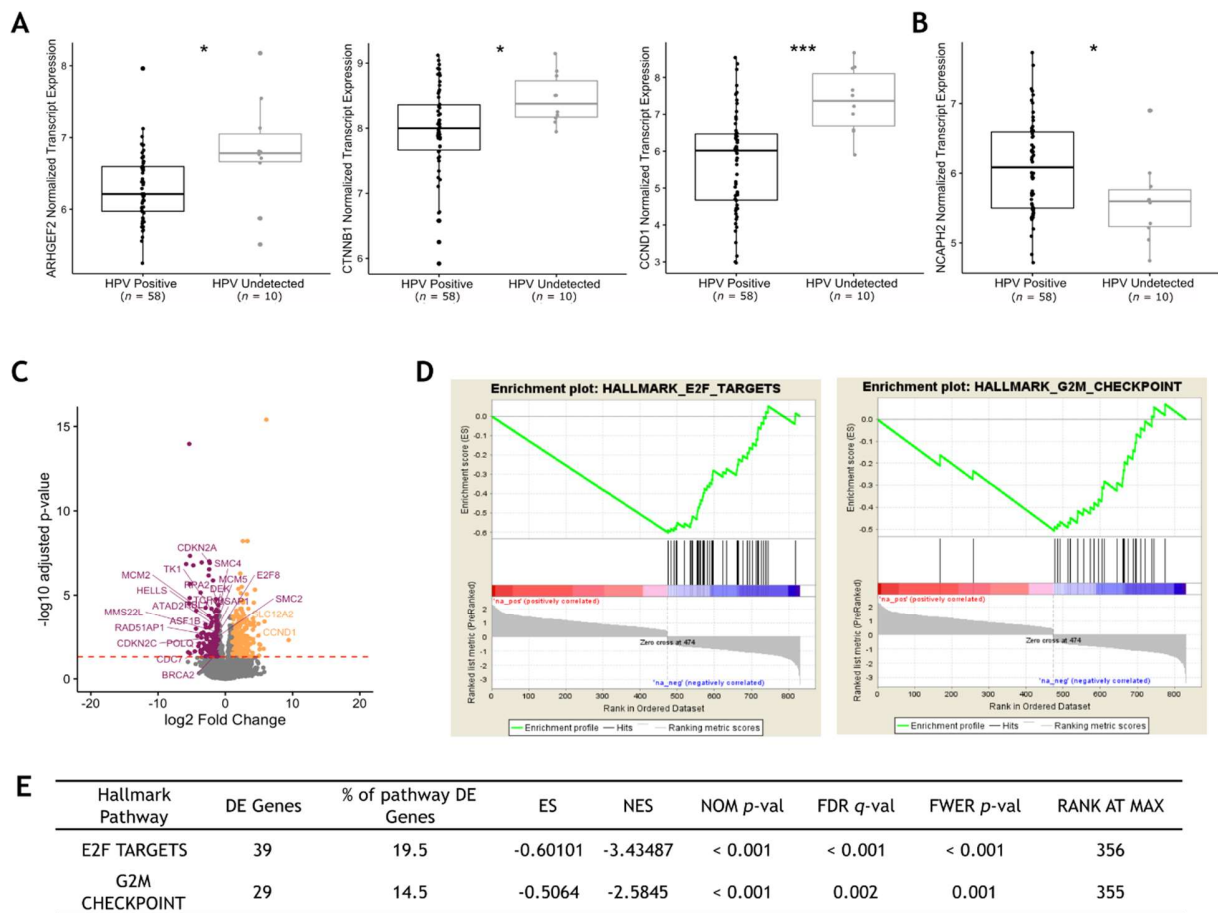

**Figure S3: WUSM SMG transcript expression and DE analysis**

A) SMGs in HPV undetected tumors from the WUSM patient cohort that are upregulated and B) down regulated (Wilcoxon test  $*p < 0.05$ ,  $***p < 0.001$ ). Differentially expressed genes with  $\log_2$  fold change  $> 1$  or  $< -1$  and  $p$ -value  $< 0.05$  were used for GSEA pathway analysis. C) Volcano plot of  $\log_2$  fold change vs  $-\log_{10}$   $p$ -value for differentially expressed genes in RNAseq library (yellow = DE  $> 1$ , purple = DE  $< -1$ ); gene labels indicate the significant DE genes from the hallmark E2F targets and G2M checkpoint pathways. D) Significant pathways altered in HPV<sup>U</sup> vs HPV<sup>+</sup> patient tumors. E) Table of significantly altered pathways from GSEA analysis.

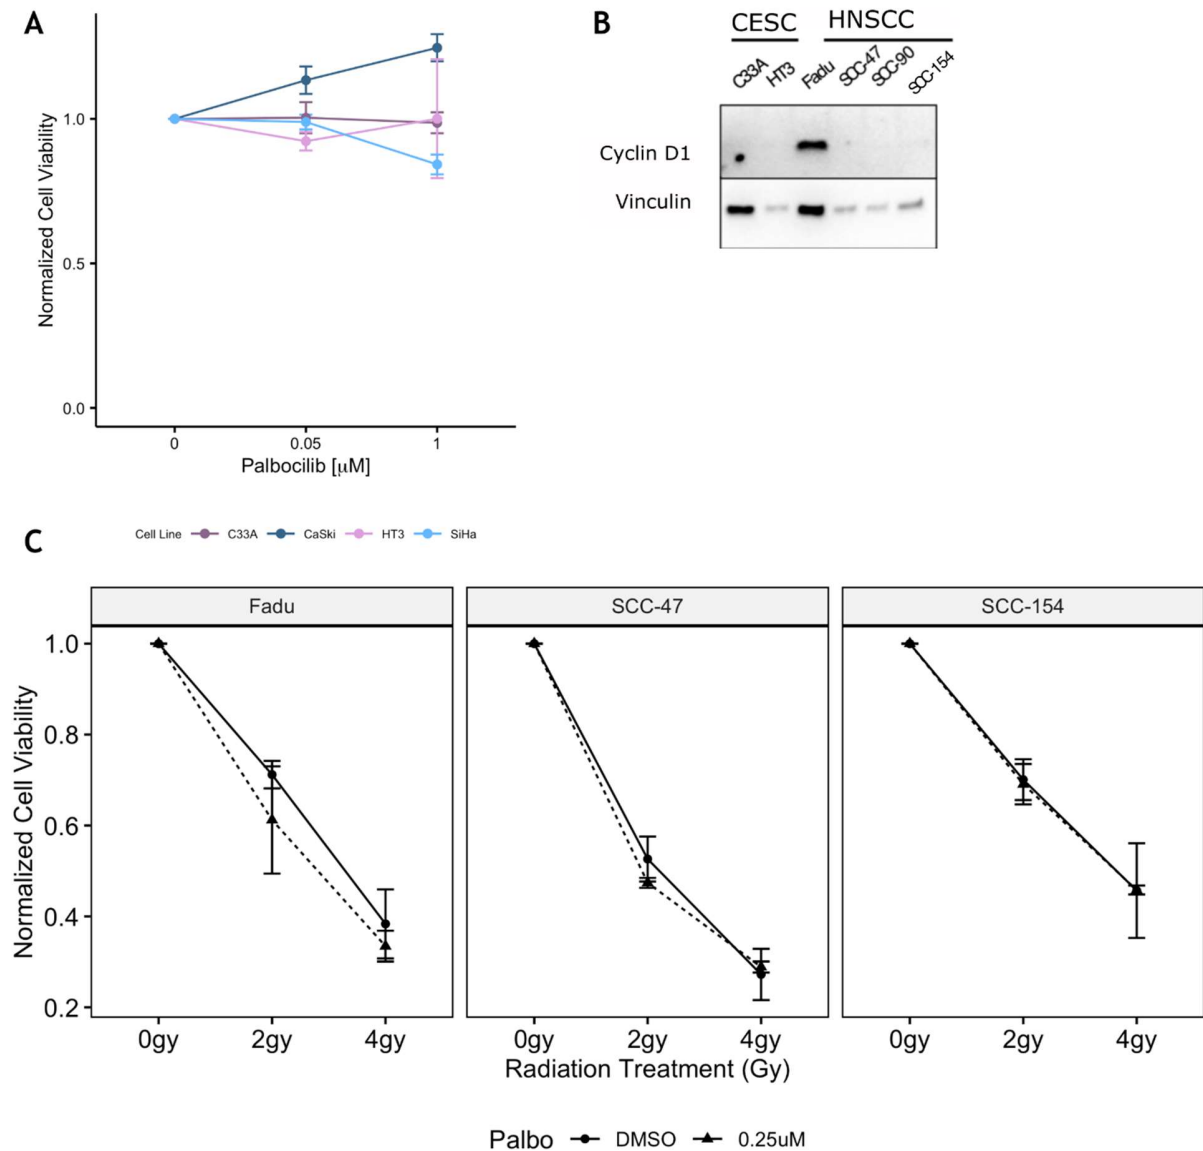

**Figure S4: CESC and HNSCC cell line sensitivity to Palbociclib mono-therapy and combination with RT**

A) Cervical cancer cell line sensitivity to palbociclib monotherapy (HPVU: C33A, HT3; HPV+: CaSki, SiHa). B) Cyclin D1 protein expression by western blot analysis (vinculin serves as a loading control). C) Cell viability by alamar blue was evaluated 5 days after Palbociclib in combination with radiation treatment (Student's t-test, no significance).
